# Supplementary material
Source: publisher figshare collection journal article supplement (https://acs.figshare.com/ndownloader/files/5170459)
Supplement: Supplementary file 1 [file 5170459]

data_General
_audit_creation_date                  '2003-10-24'
_audit_creation_method                'by CrystalStructure v3.5.1'
_audit_update_record                   ?

#==============================================================================

# PROCESSING SUMMARY (IUCr Office Use Only)

_journal_date_recd_electronic     ?
_journal_date_from_coeditor       ?
_journal_date_accepted            ?
_journal_coeditor_code            ?

#==============================================================================

# SUBMISSION DETAILS

_publ_contact_author_name             'Kazuhiko Mizuno'
_publ_contact_author_email            'mizuno@chem.osakafu-u.ac.jp'
_publ_contact_author_fax              '+81-72-254-9289'
_publ_contact_author_phone            '+81-72-254-9289'
_publ_contact_letter
;
     ENTER TEXT OF LETTER
;
_publ_requested_journal               'The Journal of Organic Chemistry'
_publ_requested_category              'CHOOSE FI FM FO CI CM CO or AD'
_publ_requested_coeditor_name          ?

#==============================================================================

# TITLE AND AUTHOR LIST

_publ_section_title
;
     ENTER SECTION TITLE
;
_publ_section_title_footnote
;
     ENTER FOOTNOTE TO TITLE OF PAPER
;
loop_
_publ_author_name
_publ_author_footnote
_publ_author_address
' FIRST AUTHORS NAME '
;
   FIRST AUTHORS FOOTNOTES
;
;
   FIRST AUTHORS ADDRESS
;
_publ_section_synopsis
;
   ENTER SYNOPSIS
;

#==============================================================================

# TEXT

_publ_section_abstract
;
     ENTER ABSTRACT
;
_publ_section_comment
;
     ENTER TEXT
;
_publ_section_references
;
     ENTER OTHER REFERENCES

     Rigaku/MSC and Rigaku Corporation. (2003).
     CrystalStructure.
     Single Crystal Structure Analysis Software. Version 3.5.1.
     Rigaku/MSC, 9009 New Trails Drive, The Woodlands, TX, USA 77381-5209.
     Rigaku, 3-9-12 Akishima, Tokyo 196-8666, Japan.

     Watkin, D.J., Prout, C.K. Carruthers, J.R. & Betteridge, P.W. (1996)
     CRYSTALS Issue 10, Chemical Crystallography Laboratory, Oxford, UK.

;
_publ_section_figure_captions
;
     ENTER FIGURE CAPTIONS
;
_publ_section_exptl_prep
;
     ENTER COMPOUND PREPARATION DETAILS
;
_publ_section_exptl_refinement
;
     ENTER SPECIAL DETAILS OF THE REFINEMENT
;

#==============================================================================

data__trans6a_________________

#==============================================================================

# CHEMICAL DATA

_chemical_formula_sum                  'C20 H26 N2 '
_chemical_formula_moiety               'C20 H26 N2 '
_chemical_formula_weight               294.44
_chemical_melting_point                ?

#==============================================================================

# CRYSTAL DATA
_symmetry_cell_setting                 monoclinic
_symmetry_space_group_name_H-M        'P 1 21 1'
_symmetry_space_group_name_Hall       'P 2yb'
_symmetry_Int_Tables_number            4
loop_
_symmetry_equiv_pos_as_xyz
  'x,y,z'
  '-x,y+1/2,-z'

#------------------------------------------------------------------------------

_cell_length_a                         16.7104(3)
_cell_length_b                         6.4424(1)
_cell_length_c                         17.8094(4)
_cell_angle_alpha                      90
_cell_angle_beta                       110.457(2)
_cell_angle_gamma                      90
_cell_volume                           1796.36(6)
_cell_formula_units_Z                  4
_cell_measurement_reflns_used          15965
_cell_measurement_theta_min            2.5
_cell_measurement_theta_max            27.4
_cell_measurement_temperature          296.1

#------------------------------------------------------------------------------

_exptl_crystal_description            'prism'
_exptl_crystal_colour                 'colorless'
_exptl_crystal_size_max                0.80
_exptl_crystal_size_mid                0.30
_exptl_crystal_size_min                0.20
_exptl_crystal_density_diffrn          1.089
_exptl_crystal_density_meas            ?
_exptl_crystal_density_method         'not measured'
_exptl_crystal_F_000                   640.00
_exptl_absorpt_coefficient_mu          0.064
_exptl_absorpt_correction_type         none

#==============================================================================

# EXPERIMENTAL DATA

_diffrn_radiation_type                'Mo K\a'
_diffrn_radiation_wavelength           0.7107
_diffrn_measurement_device_type       'Rigaku RAXIS-RAPID'
_diffrn_measurement_method             \w
_diffrn_detector_area_resol_mean       10.00
_diffrn_reflns_number                  4342
_diffrn_reflns_av_R_equivalents        0.049
_diffrn_reflns_theta_max               27.49
_diffrn_measured_fraction_theta_max    0.9642
_diffrn_reflns_theta_full              27.49
_diffrn_measured_fraction_theta_full   0.9642
_diffrn_reflns_limit_h_min             0
_diffrn_reflns_limit_h_max             21
_diffrn_reflns_limit_k_min             0
_diffrn_reflns_limit_k_max             8
_diffrn_reflns_limit_l_min             -23
_diffrn_reflns_limit_l_max             21

#==============================================================================

# REFINEMENT DATA

_refine_special_details
;
     Refinement using reflections with F^2^ > 0.5 sigma(F^2^).
     The weighted R-factor(wR), goodness of fit (S) and R-factor (gt) are
     based on F, with F set to zero for negative F. The threshold expression of
     F^2^ > 2.0 sigma(F^2^) is used only for calculating R-factor (gt).
;
_reflns_number_total                   4338
_reflns_number_gt                      3145
_reflns_threshold_expression           F^2^>2.0\s(F^2^)
_refine_ls_structure_factor_coef       F
_refine_ls_R_factor_gt                 0.0790
_refine_ls_wR_factor_ref               0.1360
_refine_ls_hydrogen_treatment          refall
_refine_ls_number_reflns               3823
_refine_ls_number_parameters           449
_refine_ls_goodness_of_fit_ref         1.030
_refine_ls_weighting_scheme            calc
_refine_ls_weighting_details
'w = 1/[0.0010Fo^2^ + 1.0000\s(Fo^2^) + 0.1000]'
_refine_ls_shift/su_max                0.0000
_refine_diff_density_max               0.95
_refine_diff_density_min               -0.47
_refine_ls_extinction_method           none
_refine_ls_extinction_coef             ?
_refine_ls_abs_structure_details       ?
_refine_ls_abs_structure_Flack         ?

loop_
_atom_type_symbol
_atom_type_description
_atom_type_scat_dispersion_real
_atom_type_scat_dispersion_imag
_atom_type_scat_source
   'C' 'C'  0.003 0.002
;
International Tables for Crystallography
(1992, Vol. C, Tables 4.2.6.8 and 6.1.1.4)
;
   'H' 'H'  0.000 0.000
;
International Tables for Crystallography
(1992, Vol. C, Table 6.1.1.4)
;
   'N' 'N'  0.006 0.003
;
International Tables for Crystallography
(1992, Vol. C, Tables 4.2.6.8 and 6.1.1.4)
;

#==============================================================================

# ATOMIC COORDINATES AND THERMAL PARAMETERS

loop_
_atom_site_label
_atom_site_type_symbol
_atom_site_fract_x
_atom_site_fract_y
_atom_site_fract_z
_atom_site_U_iso_or_equiv
_atom_site_adp_type
_atom_site_occupancy
_atom_site_symmetry_multiplicity
_atom_site_calc_flag
_atom_site_refinement_flags
_atom_site_disorder_assembly
_atom_site_disorder_group
  N(1)   N  1.4016      -0.7492     0.2798      0.086(3)    Uani 1.00 1 d . . .
  N(2)   N  1.5370      -0.1892     0.3052      0.077(2)    Uani 1.00 1 d . . .
  N(3)   N  1.0348      -0.4397     0.2213      0.114(4)    Uani 1.00 1 d . . .
  N(4)   N  1.1613      0.1164      0.2049      0.097(3)    Uani 1.00 1 d . . .
  C(5)   C  1.3708      -0.2095     -0.0016     0.044(2)    Uani 1.00 1 d . . .
  C(7)   C  1.4056      -0.4574     0.1147      0.052(2)    Uani 1.00 1 d . . .
  C(11)  C  1.3850      -0.3541     0.2449      0.042(2)    Uani 1.00 1 d . . .
  C(14)  C  1.3228      -0.2602     0.2834      0.050(2)    Uani 1.00 1 d . . .
  C(10)  C  1.3511      -0.3315     0.1521      0.043(2)    Uani 1.00 1 d . . .
  C(13)  C  1.4714      -0.2603     0.2799      0.051(2)    Uani 1.00 1 d . . .
  C(9)   C  1.3466      -0.1066     0.1258      0.055(2)    Uani 1.00 1 d . . .
  C(8)   C  1.3150      -0.0890     0.0346      0.059(2)    Uani 1.00 1 d . . .
  C(33)  C  1.1089      0.0485      0.2237      0.066(3)    Uani 1.00 1 d . . .
  C(34)  C  0.9529      0.0520      0.2001      0.056(2)    Uani 1.00 1 d . . .
  C(3)   C  1.3566      0.0543      -0.1091     0.066(3)    Uani 1.00 1 d . . .
  C(15)  C  1.3507      -0.2812     0.3732      0.050(2)    Uani 1.00 1 d . . .
  C(1)   C  1.3479      -0.1759     -0.0923     0.052(2)    Uani 1.00 1 d . . .
  C(40)  C  0.8848      -0.1479     0.0724      0.063(2)    Uani 1.00 1 d . . .
  C(31)  C  1.0415      -0.0414     0.2496      0.055(2)    Uani 1.00 1 d . . .
  C(38)  C  0.8804      -0.0152     -0.0524     0.071(3)    Uani 1.00 1 d . . .
  C(20)  C  1.3965      -0.1278     0.4222      0.063(2)    Uani 1.00 1 d . . .
  C(35)  C  0.9267      0.0252      0.1115      0.053(2)    Uani 1.00 1 d . . .
  C(12)  C  1.3954      -0.5804     0.2653      0.058(2)    Uani 1.00 1 d . . .
  C(19)  C  1.4228      -0.1495     0.5048      0.073(3)    Uani 1.00 1 d . . .
  C(16)  C  1.3323      -0.4586     0.4079      0.064(3)    Uani 1.00 1 d . . .
  C(37)  C  0.9210      0.1616      -0.0158     0.068(3)    Uani 1.00 1 d . . .
  C(36)  C  0.9441      0.1811      0.0669      0.058(2)    Uani 1.00 1 d . . .
  C(39)  C  0.8619      -0.1682     -0.0087     0.074(3)    Uani 1.00 1 d . . .
  C(4)   C  1.2569      -0.2481     -0.1406     0.077(3)    Uani 1.00 1 d . . .
  C(6)   C  1.3724      -0.4338     0.0237      0.054(2)    Uani 1.00 1 d . . .
  C(29)  C  1.0703      0.1959      0.3704      0.088(3)    Uani 1.00 1 d . . .
  C(2)   C  1.4080      -0.2986     -0.1225     0.069(3)    Uani 1.00 1 d . . .
  C(18)  C  1.4047      -0.3206     0.5388      0.077(3)    Uani 1.00 1 d . . .
  C(21)  C  1.1892      0.1091      0.6010      0.064(3)    Uani 1.00 1 d . . .
  C(25)  C  1.1648      0.0842      0.5104      0.066(3)    Uani 1.00 1 d . . .
  C(26)  C  1.1558      -0.1356     0.4830      0.088(3)    Uani 1.00 1 d . . .
  C(24)  C  1.2748      -0.0026     0.6440      0.085(3)    Uani 1.00 1 d . . .
  C(22)  C  1.1228      0.0182      0.6320      0.084(3)    Uani 1.00 1 d . . .
  C(27)  C  1.1422      -0.1441     0.3906      0.095(3)    Uani 1.00 1 d . . .
  C(30)  C  1.0627      -0.0211     0.3428      0.070(3)    Uani 1.00 1 d . . .
  C(17)  C  1.3616      -0.4744     0.4921      0.079(3)    Uani 1.00 1 d . . .
  C(32)  C  1.0409      -0.2670     0.2330      0.071(3)    Uani 1.00 1 d . . .
  C(28)  C  1.0844      0.2018      0.4611      0.099(4)    Uani 1.00 1 d . . .
  C(23)  C  1.2030      0.3379      0.6246      0.106(5)    Uani 1.00 1 d . . .
  H(1)   H  1.4031      -0.4423     -0.1130     0.088(4)    Uiso 1.00 1 c . . .
  H(2)   H  1.3949      -0.2759     -0.1782     0.088(4)    Uiso 1.00 1 c . . .
  H(3)   H  1.4647      -0.2538     -0.0940     0.088(4)    Uiso 1.00 1 c . . .
  H(4)   H  1.4131      0.0978      -0.0793     0.081(3)    Uiso 1.00 1 c . . .
  H(5)   H  1.3455      0.0750      -0.1646     0.081(3)    Uiso 1.00 1 c . . .
  H(6)   H  1.3172      0.1332      -0.0931     0.081(3)    Uiso 1.00 1 c . . .
  H(7)   H  1.2177      -0.1694     -0.1244     0.089(4)    Uiso 1.00 1 c . . .
  H(8)   H  1.2459      -0.2261     -0.1960     0.089(4)    Uiso 1.00 1 c . . .
  H(9)   H  1.2505      -0.3913     -0.1313     0.089(4)    Uiso 1.00 1 c . . .
  H(10)  H  1.4267      -0.1556     0.0235      0.053(2)    Uiso 1.00 1 c . . .
  H(11)  H  1.3168      -0.4912     0.0013      0.066(3)    Uiso 1.00 1 c . . .
  H(12)  H  1.4104      -0.5073     0.0042      0.066(3)    Uiso 1.00 1 c . . .
  H(13)  H  1.4630      -0.4102     0.1364      0.063(3)    Uiso 1.00 1 c . . .
  H(14)  H  1.4031      -0.5997     0.1277      0.063(3)    Uiso 1.00 1 c . . .
  H(15)  H  1.3125      0.0528      0.0193      0.071(3)    Uiso 1.00 1 c . . .
  H(16)  H  1.2594      -0.1475     0.0141      0.071(3)    Uiso 1.00 1 c . . .
  H(17)  H  1.3094      -0.0316     0.1459      0.067(3)    Uiso 1.00 1 c . . .
  H(18)  H  1.4023      -0.0485     0.1466      0.067(3)    Uiso 1.00 1 c . . .
  H(19)  H  1.2946      -0.3852     0.1323      0.051(2)    Uiso 1.00 1 c . . .
  H(20)  H  1.3162      -0.1166     0.2706      0.062(2)    Uiso 1.00 1 c . . .
  H(21)  H  1.2692      -0.3280     0.2609      0.062(2)    Uiso 1.00 1 c . . .
  H(22)  H  1.3012      -0.5687     0.3751      0.081(3)    Uiso 1.00 1 c . . .
  H(23)  H  1.3490      -0.5958     0.5161      0.103(4)    Uiso 1.00 1 c . . .
  H(24)  H  1.4226      -0.3332     0.5954      0.096(4)    Uiso 1.00 1 c . . .
  H(25)  H  1.4553      -0.0429     0.5387      0.088(3)    Uiso 1.00 1 c . . .
  H(26)  H  1.4104      -0.0063     0.3991      0.078(3)    Uiso 1.00 1 c . . .
  H(27)  H  1.1384      0.0413      0.6880      0.104(4)    Uiso 1.00 1 c . . .
  H(28)  H  1.0698      0.0841      0.6046      0.104(4)    Uiso 1.00 1 c . . .
  H(29)  H  1.1177      -0.1267     0.6215      0.104(4)    Uiso 1.00 1 c . . .
  H(30)  H  1.2246      0.3520      0.6812      0.130(6)    Uiso 1.00 1 c . . .
  H(31)  H  1.2453      0.3810      0.6035      0.130(6)    Uiso 1.00 1 c . . .
  H(32)  H  1.1535      0.4219      0.6028      0.130(6)    Uiso 1.00 1 c . . .
  H(33)  H  1.2654      -0.1466     0.6328      0.098(4)    Uiso 1.00 1 c . . .
  H(34)  H  1.3162      0.0465      0.6228      0.098(4)    Uiso 1.00 1 c . . .
  H(35)  H  1.2949      0.0187      0.7003      0.098(4)    Uiso 1.00 1 c . . .
  H(36)  H  1.2113      0.1407      0.4982      0.077(3)    Uiso 1.00 1 c . . .
  H(37)  H  1.2072      -0.2064     0.5117      0.097(4)    Uiso 1.00 1 c . . .
  H(38)  H  1.1094      -0.2005     0.4929      0.097(4)    Uiso 1.00 1 c . . .
  H(39)  H  1.1905      -0.0891     0.3808      0.105(4)    Uiso 1.00 1 c . . .
  H(40)  H  1.1347      -0.2854     0.3745      0.105(4)    Uiso 1.00 1 c . . .
  H(41)  H  1.0941      0.3419      0.4786      0.116(5)    Uiso 1.00 1 c . . .
  H(42)  H  1.0350      0.1509      0.4697      0.116(5)    Uiso 1.00 1 c . . .
  H(43)  H  1.1176      0.2575      0.3610      0.099(4)    Uiso 1.00 1 c . . .
  H(44)  H  1.0197      0.2700      0.3417      0.099(4)    Uiso 1.00 1 c . . .
  H(45)  H  1.0157      -0.0791     0.3539      0.078(3)    Uiso 1.00 1 c . . .
  H(46)  H  0.9110      -0.0173     0.2157      0.068(3)    Uiso 1.00 1 c . . .
  H(47)  H  0.9531      0.1955      0.2124      0.068(3)    Uiso 1.00 1 c . . .
  H(48)  H  0.9720      0.3041      0.0924      0.068(3)    Uiso 1.00 1 c . . .
  H(49)  H  0.9334      0.2694      -0.0464     0.081(3)    Uiso 1.00 1 c . . .
  H(50)  H  0.8660      -0.0292     -0.1087     0.083(3)    Uiso 1.00 1 c . . .
  H(51)  H  0.8328      -0.2888     -0.0353     0.086(3)    Uiso 1.00 1 c . . .
  H(52)  H  0.8714      -0.2550     0.1027      0.075(3)    Uiso 1.00 1 c . . .


loop_
_atom_site_aniso_label
_atom_site_aniso_U_11
_atom_site_aniso_U_22
_atom_site_aniso_U_33
_atom_site_aniso_U_12
_atom_site_aniso_U_13
_atom_site_aniso_U_23
  N(1)   0.1557      0.0422      0.0650      0.0154      0.0433      0.0076
  N(2)   0.0515      0.0907      0.0816      -0.0034     0.0154      -0.0219
  N(3)   0.2048      0.0530      0.0762      0.0144      0.0398      0.0027
  N(4)   0.0612      0.1002      0.1267      0.0226      0.0292      0.0396
  C(5)   0.0434      0.0452      0.0439      -0.0027     0.0141      -0.0018
  C(7)   0.0724      0.0386      0.0473      0.0128      0.0255      0.0030
  C(11)  0.0455      0.0403      0.0411      0.0044      0.0147      0.0036
  C(14)  0.0511      0.0519      0.0508      0.0113      0.0217      0.0046
  C(10)  0.0461      0.0393      0.0423      0.0031      0.0151      -0.0007
  C(13)  0.0555      0.0512      0.0474      0.0159      0.0184      0.0019
  C(9)   0.0719      0.0454      0.0511      0.0133      0.0264      0.0051
  C(8)   0.0716      0.0559      0.0490      0.0210      0.0202      0.0078
  C(33)  0.0556      0.0611      0.0732      0.0188      0.0117      0.0101
  C(34)  0.0480      0.0581      0.0628      0.0042      0.0187      -0.0057
  C(3)   0.0925      0.0549      0.0545      -0.0027     0.0295      0.0096
  C(15)  0.0497      0.0550      0.0518      0.0137      0.0275      0.0127
  C(1)   0.0549      0.0590      0.0426      -0.0118     0.0175      0.0001
  C(40)  0.0545      0.0655      0.0679      -0.0080     0.0211      -0.0040
  C(31)  0.0628      0.0484      0.0530      0.0097      0.0193      -0.0002
  C(38)  0.0502      0.1022      0.0549      0.0100      0.0106      -0.0123
  C(20)  0.0807      0.0621      0.0524      0.0073      0.0320      0.0068
  C(35)  0.0430      0.0629      0.0539      0.0050      0.0164      -0.0018
  C(12)  0.0777      0.0528      0.0437      0.0118      0.0221      0.0006
  C(19)  0.0887      0.0801      0.0521      0.0053      0.0270      -0.0006
  C(16)  0.0758      0.0612      0.0667      -0.0004     0.0382      0.0062
  C(37)  0.0572      0.0801      0.0646      0.0044      0.0199      0.0109
  C(36)  0.0523      0.0578      0.0596      0.0010      0.0126      -0.0046
  C(39)  0.0519      0.0794      0.0832      -0.0025     0.0126      -0.0236
  C(4)   0.0630      0.1076      0.0512      -0.0280     0.0070      0.0074
  C(6)   0.0666      0.0479      0.0500      0.0026      0.0244      -0.0042
  C(29)  0.1245      0.0510      0.0718      0.0239      0.0135      0.0031
  C(2)   0.0933      0.0683      0.0584      -0.0062     0.0421      -0.0016
  C(18)  0.0881      0.1010      0.0521      0.0211      0.0359      0.0182
  C(21)  0.0750      0.0692      0.0471      -0.0101     0.0200      -0.0001
  C(25)  0.0729      0.0659      0.0531      0.0066      0.0144      0.0052
  C(26)  0.1026      0.0713      0.0675      0.0075      0.0014      0.0124
  C(24)  0.0788      0.1070      0.0587      -0.0032     0.0093      -0.0029
  C(22)  0.0936      0.1045      0.0608      -0.0077     0.0340      -0.0038
  C(27)  0.1052      0.0950      0.0631      0.0530      0.0020      -0.0099
  C(30)  0.0744      0.0631      0.0584      0.0204      0.0071      -0.0082
  C(17)  0.1010      0.0796      0.0765      0.0162      0.0544      0.0319
  C(32)  0.1032      0.0541      0.0547      0.0130      0.0257      0.0046
  C(28)  0.1310      0.0993      0.0600      0.0469      0.0251      -0.0070
  C(23)  0.1545      0.0811      0.0892      -0.0183     0.0496      -0.0173

#==============================================================================

_computing_data_collection            'PROCESS-AUTO'
_computing_cell_refinement            'PROCESS-AUTO'
_computing_data_reduction             'CrystalStructure'
_computing_structure_solution         'SIR92'
_computing_structure_refinement       'CRYSTALS'
_computing_publication_material       'CrystalStructure Ver. 3.5.1'
_computing_molecular_graphics          ?

#==============================================================================

# MOLECULAR GEOMETRY

_geom_special_details
;
     ENTER SPECIAL DETAILS OF THE MOLECULAR GEOMETRY
;

loop_
_geom_bond_atom_site_label_1
_geom_bond_atom_site_label_2
_geom_bond_distance
_geom_bond_publ_flag
_geom_bond_site_symmetry_1
_geom_bond_site_symmetry_2
N(1)      C(12)     1.11(1)     yes  . .
N(2)      C(13)     1.13(1)     yes  . .
N(3)      C(32)     1.13(1)     yes  . .
N(4)      C(33)     1.13(1)     yes  . .
C(5)      C(8)      1.52(1)     yes  . .
C(5)      C(1)      1.54(1)     yes  . .
C(5)      C(6)      1.51(1)     yes  . .
C(5)      H(10)     0.950(9)    no   . .
C(7)      C(10)     1.54(1)     yes  . .
C(7)      C(6)      1.53(1)     yes  . .
C(7)      H(13)     0.95(1)     no   . .
C(7)      H(14)     0.95(1)     no   . .
C(11)     C(14)     1.55(1)     yes  . .
C(11)     C(10)     1.555(9)    yes  . .
C(11)     C(13)     1.49(1)     yes  . .
C(11)     C(12)     1.50(1)     yes  . .
C(14)     C(15)     1.51(1)     yes  . .
C(14)     H(20)     0.95(1)     no   . .
C(14)     H(21)     0.95(1)     no   . .
C(10)     C(9)      1.52(1)     yes  . .
C(10)     H(19)     0.95(1)     no   . .
C(9)      C(8)      1.53(1)     yes  . .
C(9)      H(17)     0.95(1)     no   . .
C(9)      H(18)     0.95(1)     no   . .
C(8)      H(15)     0.95(1)     no   . .
C(8)      H(16)     0.95(1)     no   . .
C(33)     C(31)     1.48(1)     yes  . .
C(34)     C(31)     1.56(1)     yes  . .
C(34)     C(35)     1.49(1)     yes  . .
C(34)     H(46)     0.95(1)     no   . .
C(34)     H(47)     0.95(1)     no   . .
C(3)      C(1)      1.53(1)     yes  . .
C(3)      H(4)      0.95(1)     no   . .
C(3)      H(5)      0.95(1)     no   . .
C(3)      H(6)      0.95(2)     no   . .
C(15)     C(20)     1.36(1)     yes  . .
C(15)     C(16)     1.38(1)     yes  . .
C(1)      C(4)      1.53(1)     yes  . .
C(1)      C(2)      1.52(1)     yes  . .
C(40)     C(35)     1.37(1)     yes  . .
C(40)     C(39)     1.36(1)     yes  . .
C(40)     H(52)     0.95(1)     no   . .
C(31)     C(30)     1.58(1)     yes  . .
C(31)     C(32)     1.48(1)     yes  . .
C(38)     C(37)     1.37(1)     yes  . .
C(38)     C(39)     1.36(2)     yes  . .
C(38)     H(50)     0.95(1)     no   . .
C(20)     C(19)     1.39(1)     yes  . .
C(20)     H(26)     0.95(1)     no   . .
C(35)     C(36)     1.37(1)     yes  . .
C(19)     C(18)     1.34(2)     yes  . .
C(19)     H(25)     0.95(1)     no   . .
C(16)     C(17)     1.41(1)     yes  . .
C(16)     H(22)     0.95(1)     no   . .
C(37)     C(36)     1.39(1)     yes  . .
C(37)     H(49)     0.95(1)     no   . .
C(36)     H(48)     0.95(1)     no   . .
C(39)     H(51)     0.95(2)     no   . .
C(4)      H(7)      0.95(1)     no   . .
C(4)      H(8)      0.95(1)     no   . .
C(4)      H(9)      0.95(2)     no   . .
C(6)      H(11)     0.95(1)     no   . .
C(6)      H(12)     0.95(1)     no   . .
C(29)     C(30)     1.47(1)     yes  . .
C(29)     C(28)     1.55(1)     yes  . .
C(29)     H(43)     0.95(2)     no   . .
C(29)     H(44)     0.95(2)     no   . .
C(2)      H(1)      0.95(1)     no   . .
C(2)      H(2)      0.95(1)     no   . .
C(2)      H(3)      0.95(1)     no   . .
C(18)     C(17)     1.33(2)     yes  . .
C(18)     H(24)     0.95(1)     no   . .
C(21)     C(25)     1.53(1)     yes  . .
C(21)     C(24)     1.54(1)     yes  . .
C(21)     C(22)     1.52(2)     yes  . .
C(21)     C(23)     1.53(2)     yes  . .
C(25)     C(26)     1.49(2)     yes  . .
C(25)     C(28)     1.53(1)     yes  . .
C(25)     H(36)     0.95(1)     no   . .
C(26)     C(27)     1.58(1)     yes  . .
C(26)     H(37)     0.95(2)     no   . .
C(26)     H(38)     0.95(2)     no   . .
C(24)     H(33)     0.95(2)     no   . .
C(24)     H(34)     0.95(2)     no   . .
C(24)     H(35)     0.95(1)     no   . .
C(22)     H(27)     0.95(1)     no   . .
C(22)     H(28)     0.95(1)     no   . .
C(22)     H(29)     0.95(2)     no   . .
C(27)     C(30)     1.53(1)     yes  . .
C(27)     H(39)     0.95(2)     no   . .
C(27)     H(40)     0.95(2)     no   . .
C(30)     H(45)     0.95(1)     no   . .
C(17)     H(23)     0.95(2)     no   . .
C(28)     H(41)     0.95(2)     no   . .
C(28)     H(42)     0.95(2)     no   . .
C(23)     H(30)     0.95(2)     no   . .
C(23)     H(31)     0.95(2)     no   . .
C(23)     H(32)     0.95(2)     no   . .

loop_
_geom_angle_atom_site_label_1
_geom_angle_atom_site_label_2
_geom_angle_atom_site_label_3
_geom_angle
_geom_angle_publ_flag
_geom_angle_site_symmetry_1
_geom_angle_site_symmetry_2
_geom_angle_site_symmetry_3
C(8)      C(5)      C(1)      114.2(6)    yes   . . .
C(8)      C(5)      C(6)      108.1(7)    yes   . . .
C(8)      C(5)      H(10)     105.2(8)    no    . . .
C(1)      C(5)      C(6)      114.8(6)    yes   . . .
C(1)      C(5)      H(10)     106.6(8)    no    . . .
C(6)      C(5)      H(10)     107.3(7)    no    . . .
C(10)     C(7)      C(6)      111.0(6)    yes   . . .
C(10)     C(7)      H(13)     108.7(8)    no    . . .
C(10)     C(7)      H(14)     108.7(9)    no    . . .
C(6)      C(7)      H(13)     110.0(9)    no    . . .
C(6)      C(7)      H(14)     109.0(8)    no    . . .
H(13)     C(7)      H(14)     109.5(9)    no    . . .
C(14)     C(11)     C(10)     112.3(5)    yes   . . .
C(14)     C(11)     C(13)     111.0(6)    yes   . . .
C(14)     C(11)     C(12)     108.1(7)    yes   . . .
C(10)     C(11)     C(13)     110.3(6)    yes   . . .
C(10)     C(11)     C(12)     108.5(6)    yes   . . .
C(13)     C(11)     C(12)     106.3(6)    yes   . . .
C(15)     C(14)     H(20)     108.0(8)    no    . . .
C(15)     C(14)     H(21)     107.7(8)    no    . . .
C(15)     C(14)     C(11)     115.2(6)    yes   . . .
H(20)     C(14)     H(21)     109.5(9)    no    . . .
H(20)     C(14)     C(11)     108.2(9)    no    . . .
H(21)     C(14)     C(11)     108.2(8)    no    . . .
C(9)      C(10)     H(19)     107.3(7)    no    . . .
C(9)      C(10)     C(7)      110.1(7)    yes   . . .
C(9)      C(10)     C(11)     112.2(6)    yes   . . .
H(19)     C(10)     C(7)      108.1(8)    no    . . .
H(19)     C(10)     C(11)     107.8(8)    no    . . .
C(7)      C(10)     C(11)     111.1(5)    yes   . . .
N(2)      C(13)     C(11)     178.8(9)    yes   . . .
C(8)      C(9)      H(17)     109.5(8)    no    . . .
C(8)      C(9)      H(18)     108.2(9)    no    . . .
C(8)      C(9)      C(10)     111.2(6)    yes   . . .
H(17)     C(9)      H(18)     109(1)      no    . . .
H(17)     C(9)      C(10)     109(1)      no    . . .
H(18)     C(9)      C(10)     108.7(8)    no    . . .
H(15)     C(8)      H(16)     109(1)      no    . . .
H(15)     C(8)      C(5)      109(1)      no    . . .
H(15)     C(8)      C(9)      109.9(8)    no    . . .
H(16)     C(8)      C(5)      107.3(9)    no    . . .
H(16)     C(8)      C(9)      107.9(9)    no    . . .
C(5)      C(8)      C(9)      112.2(6)    yes   . . .
C(31)     C(33)     N(4)      179.0(9)    yes   . . .
C(31)     C(34)     C(35)     115.1(7)    yes   . . .
C(31)     C(34)     H(46)     107.7(9)    no    . . .
C(31)     C(34)     H(47)     108.7(7)    no    . . .
C(35)     C(34)     H(46)     106.3(7)    no    . . .
C(35)     C(34)     H(47)     109.4(9)    no    . . .
H(46)     C(34)     H(47)     109(1)      no    . . .
C(1)      C(3)      H(4)      108.7(9)    no    . . .
C(1)      C(3)      H(5)      109(1)      no    . . .
C(1)      C(3)      H(6)      109(1)      no    . . .
H(4)      C(3)      H(5)      109(1)      no    . . .
H(4)      C(3)      H(6)      109(1)      no    . . .
H(5)      C(3)      H(6)      109(1)      no    . . .
C(20)     C(15)     C(16)     118.4(7)    yes   . . .
C(20)     C(15)     C(14)     120.7(8)    yes   . . .
C(16)     C(15)     C(14)     120.9(7)    yes   . . .
C(4)      C(1)      C(2)      107.1(7)    yes   . . .
C(4)      C(1)      C(5)      112.3(7)    yes   . . .
C(4)      C(1)      C(3)      109.1(7)    yes   . . .
C(2)      C(1)      C(5)      110.2(6)    yes   . . .
C(2)      C(1)      C(3)      108.5(8)    yes   . . .
C(5)      C(1)      C(3)      109.6(6)    yes   . . .
C(35)     C(40)     C(39)     121.4(9)    yes   . . .
C(35)     C(40)     H(52)     118(1)      no    . . .
C(39)     C(40)     H(52)     119(1)      no    . . .
C(30)     C(31)     C(32)     106.0(7)    yes   . . .
C(30)     C(31)     C(33)     112.5(7)    yes   . . .
C(30)     C(31)     C(34)     112.6(8)    yes   . . .
C(32)     C(31)     C(33)     106.0(9)    yes   . . .
C(32)     C(31)     C(34)     109.1(7)    yes   . . .
C(33)     C(31)     C(34)     110.4(7)    yes   . . .
C(37)     C(38)     C(39)     120.4(8)    yes   . . .
C(37)     C(38)     H(50)     118(1)      no    . . .
C(39)     C(38)     H(50)     120(1)      no    . . .
C(19)     C(20)     H(26)     120(1)      no    . . .
C(19)     C(20)     C(15)     120.3(9)    yes   . . .
H(26)     C(20)     C(15)     119.2(8)    no    . . .
C(36)     C(35)     C(34)     118.9(7)    yes   . . .
C(36)     C(35)     C(40)     118.3(7)    yes   . . .
C(34)     C(35)     C(40)     122.7(8)    yes   . . .
N(1)      C(12)     C(11)     178(1)      yes   . . .
C(18)     C(19)     H(25)     118(1)      no    . . .
C(18)     C(19)     C(20)     121.6(9)    yes   . . .
H(25)     C(19)     C(20)     119(1)      no    . . .
C(17)     C(16)     H(22)     120(1)      no    . . .
C(17)     C(16)     C(15)     119.1(8)    yes   . . .
H(22)     C(16)     C(15)     120(1)      no    . . .
C(36)     C(37)     H(49)     120(1)      no    . . .
C(36)     C(37)     C(38)     119.2(9)    yes   . . .
H(49)     C(37)     C(38)     120(1)      no    . . .
H(48)     C(36)     C(35)     120.1(9)    no    . . .
H(48)     C(36)     C(37)     119(1)      no    . . .
C(35)     C(36)     C(37)     120.6(8)    yes   . . .
H(51)     C(39)     C(40)     120(1)      no    . . .
H(51)     C(39)     C(38)     119(1)      no    . . .
C(40)     C(39)     C(38)     120(1)      yes   . . .
H(7)      C(4)      H(8)      109(1)      no    . . .
H(7)      C(4)      H(9)      109(1)      no    . . .
H(7)      C(4)      C(1)      108(1)      no    . . .
H(8)      C(4)      H(9)      109(1)      no    . . .
H(8)      C(4)      C(1)      109(1)      no    . . .
H(9)      C(4)      C(1)      110.3(8)    no    . . .
H(11)     C(6)      H(12)     109(1)      no    . . .
H(11)     C(6)      C(5)      109.5(8)    no    . . .
H(11)     C(6)      C(7)      110.3(9)    no    . . .
H(12)     C(6)      C(5)      108(1)      no    . . .
H(12)     C(6)      C(7)      107.3(8)    no    . . .
C(5)      C(6)      C(7)      112.0(6)    yes   . . .
C(30)     C(29)     C(28)     109.6(9)    yes   . . .
C(30)     C(29)     H(43)     108(1)      no    . . .
C(30)     C(29)     H(44)     109(1)      no    . . .
C(28)     C(29)     H(43)     109(1)      no    . . .
C(28)     C(29)     H(44)     109(1)      no    . . .
H(43)     C(29)     H(44)     109(1)      no    . . .
H(1)      C(2)      H(2)      109(1)      no    . . .
H(1)      C(2)      H(3)      109(1)      no    . . .
H(1)      C(2)      C(1)      109(1)      no    . . .
H(2)      C(2)      H(3)      109(1)      no    . . .
H(2)      C(2)      C(1)      110(1)      no    . . .
H(3)      C(2)      C(1)      108(1)      no    . . .
C(17)     C(18)     H(24)     119(1)      no    . . .
C(17)     C(18)     C(19)     119.2(9)    yes   . . .
H(24)     C(18)     C(19)     120(1)      no    . . .
C(25)     C(21)     C(24)     109.4(8)    yes   . . .
C(25)     C(21)     C(22)     112.6(7)    yes   . . .
C(25)     C(21)     C(23)     110.5(8)    yes   . . .
C(24)     C(21)     C(22)     108.0(8)    yes   . . .
C(24)     C(21)     C(23)     106.8(8)    yes   . . .
C(22)     C(21)     C(23)     109(1)      yes   . . .
C(26)     C(25)     C(28)     108.4(8)    yes   . . .
C(26)     C(25)     H(36)     106(1)      no    . . .
C(26)     C(25)     C(21)     113.9(8)    yes   . . .
C(28)     C(25)     H(36)     107(1)      no    . . .
C(28)     C(25)     C(21)     114.3(9)    yes   . . .
H(36)     C(25)     C(21)     105.3(9)    no    . . .
C(27)     C(26)     H(37)     108(1)      no    . . .
C(27)     C(26)     H(38)     110(1)      no    . . .
C(27)     C(26)     C(25)     109.6(9)    yes   . . .
H(37)     C(26)     H(38)     109(1)      no    . . .
H(37)     C(26)     C(25)     108(1)      no    . . .
H(38)     C(26)     C(25)     110(1)      no    . . .
H(33)     C(24)     H(34)     109(1)      no    . . .
H(33)     C(24)     H(35)     109(1)      no    . . .
H(33)     C(24)     C(21)     107.1(9)    no    . . .
H(34)     C(24)     H(35)     109(1)      no    . . .
H(34)     C(24)     C(21)     108(1)      no    . . .
H(35)     C(24)     C(21)     112(1)      no    . . .
H(27)     C(22)     H(28)     109(1)      no    . . .
H(27)     C(22)     H(29)     109(1)      no    . . .
H(27)     C(22)     C(21)     110(1)      no    . . .
H(28)     C(22)     H(29)     109(1)      no    . . .
H(28)     C(22)     C(21)     108(1)      no    . . .
H(29)     C(22)     C(21)     109(1)      no    . . .
C(30)     C(27)     H(39)     109(1)      no    . . .
C(30)     C(27)     H(40)     109(1)      no    . . .
C(30)     C(27)     C(26)     110.0(9)    yes   . . .
H(39)     C(27)     H(40)     109(1)      no    . . .
H(39)     C(27)     C(26)     110(1)      no    . . .
H(40)     C(27)     C(26)     107(1)      no    . . .
H(45)     C(30)     C(31)     106.8(8)    no    . . .
H(45)     C(30)     C(29)     106(1)      no    . . .
H(45)     C(30)     C(27)     107(1)      no    . . .
C(31)     C(30)     C(29)     113.0(8)    yes   . . .
C(31)     C(30)     C(27)     112.0(8)    yes   . . .
C(29)     C(30)     C(27)     110.5(8)    yes   . . .
H(23)     C(17)     C(16)     119(1)      no    . . .
H(23)     C(17)     C(18)     119(1)      no    . . .
C(16)     C(17)     C(18)     121(1)      yes   . . .
N(3)      C(32)     C(31)     174(1)      yes   . . .
H(41)     C(28)     H(42)     109(1)      no    . . .
H(41)     C(28)     C(29)     108(1)      no    . . .
H(41)     C(28)     C(25)     105(1)      no    . . .
H(42)     C(28)     C(29)     109(1)      no    . . .
H(42)     C(28)     C(25)     112(1)      no    . . .
C(29)     C(28)     C(25)     111(1)      yes   . . .
H(30)     C(23)     H(31)     109(1)      no    . . .
H(30)     C(23)     H(32)     109(1)      no    . . .
H(30)     C(23)     C(21)     110(1)      no    . . .
H(31)     C(23)     H(32)     109(1)      no    . . .
H(31)     C(23)     C(21)     103(1)      no    . . .
H(32)     C(23)     C(21)     114(1)      no    . . .

loop_
_geom_torsion_atom_site_label_1
_geom_torsion_atom_site_label_2
_geom_torsion_atom_site_label_3
_geom_torsion_atom_site_label_4
_geom_torsion
_geom_torsion_publ_flag
_geom_torsion_site_symmetry_1
_geom_torsion_site_symmetry_2
_geom_torsion_site_symmetry_3
_geom_torsion_site_symmetry_4
C(1)      C(5)      C(8)      C(9)      -173.2(7)   yes   . . . .
C(1)      C(5)      C(8)      H(15)     -50.5(9)    no    . . . .
C(1)      C(5)      C(8)      H(16)     68(1)       no    . . . .
C(6)      C(5)      C(8)      C(9)      57.7(8)     yes   . . . .
C(6)      C(5)      C(8)      H(15)     -179.7(7)   no    . . . .
C(6)      C(5)      C(8)      H(16)     -60.7(9)    no    . . . .
H(10)     C(5)      C(8)      C(9)      -56(1)      no    . . . .
H(10)     C(5)      C(8)      H(15)     65(1)       no    . . . .
H(10)     C(5)      C(8)      H(16)     -175.1(9)   no    . . . .
C(8)      C(5)      C(1)      C(3)      59.5(9)     yes   . . . .
C(8)      C(5)      C(1)      C(4)      -61(1)      yes   . . . .
C(8)      C(5)      C(1)      C(2)      178.8(7)    yes   . . . .
C(6)      C(5)      C(1)      C(3)      -174.8(7)   yes   . . . .
C(6)      C(5)      C(1)      C(4)      63.8(9)     yes   . . . .
C(6)      C(5)      C(1)      C(2)      -55.5(9)    yes   . . . .
H(10)     C(5)      C(1)      C(3)      -56(1)      no    . . . .
H(10)     C(5)      C(1)      C(4)      -177.6(9)   no    . . . .
H(10)     C(5)      C(1)      C(2)      63(1)       no    . . . .
C(8)      C(5)      C(6)      C(7)      -58.0(8)    yes   . . . .
C(8)      C(5)      C(6)      H(11)     64(1)       no    . . . .
C(8)      C(5)      C(6)      H(12)     -176.0(7)   no    . . . .
C(1)      C(5)      C(6)      C(7)      173.3(7)    yes   . . . .
C(1)      C(5)      C(6)      H(11)     -64(1)      no    . . . .
C(1)      C(5)      C(6)      H(12)     55.2(9)     no    . . . .
H(10)     C(5)      C(6)      C(7)      55(1)       no    . . . .
H(10)     C(5)      C(6)      H(11)     177(1)      no    . . . .
H(10)     C(5)      C(6)      H(12)     -63(1)      no    . . . .
C(6)      C(7)      C(10)     C(11)     -179.6(6)   yes   . . . .
C(6)      C(7)      C(10)     C(9)      -54.7(8)    yes   . . . .
C(6)      C(7)      C(10)     H(19)     62.2(9)     no    . . . .
H(13)     C(7)      C(10)     C(11)     -58(1)      no    . . . .
H(13)     C(7)      C(10)     C(9)      66.4(9)     no    . . . .
H(13)     C(7)      C(10)     H(19)     -176.7(9)   no    . . . .
H(14)     C(7)      C(10)     C(11)     60.5(8)     no    . . . .
H(14)     C(7)      C(10)     C(9)      -174.5(7)   no    . . . .
H(14)     C(7)      C(10)     H(19)     -57.6(9)    no    . . . .
C(10)     C(7)      C(6)      C(5)      57.8(9)     yes   . . . .
C(10)     C(7)      C(6)      H(11)     -64(1)      no    . . . .
C(10)     C(7)      C(6)      H(12)     176.4(9)    no    . . . .
H(13)     C(7)      C(6)      C(5)      -62(1)      no    . . . .
H(13)     C(7)      C(6)      H(11)     175(1)      no    . . . .
H(13)     C(7)      C(6)      H(12)     56(1)       no    . . . .
H(14)     C(7)      C(6)      C(5)      177.5(9)    no    . . . .
H(14)     C(7)      C(6)      H(11)     55(1)       no    . . . .
H(14)     C(7)      C(6)      H(12)     -63(1)      no    . . . .
C(10)     C(11)     C(14)     C(15)     178.6(6)    yes   . . . .
C(10)     C(11)     C(14)     H(20)     -60.4(8)    no    . . . .
C(10)     C(11)     C(14)     H(21)     58(1)       no    . . . .
C(13)     C(11)     C(14)     C(15)     -57.3(9)    yes   . . . .
C(13)     C(11)     C(14)     H(20)     63.7(8)     no    . . . .
C(13)     C(11)     C(14)     H(21)     -177.8(8)   no    . . . .
C(12)     C(11)     C(14)     C(15)     58.9(8)     yes   . . . .
C(12)     C(11)     C(14)     H(20)     179(719)    no    . . . .
C(12)     C(11)     C(14)     H(21)     -61.6(8)    no    . . . .
C(14)     C(11)     C(10)     C(7)      -170.3(6)   yes   . . . .
C(14)     C(11)     C(10)     C(9)      66.0(8)     yes   . . . .
C(14)     C(11)     C(10)     H(19)     -51(1)      no    . . . .
C(13)     C(11)     C(10)     C(7)      65.3(8)     yes   . . . .
C(13)     C(11)     C(10)     C(9)      -58.4(8)    yes   . . . .
C(13)     C(11)     C(10)     H(19)     -176.4(8)   no    . . . .
C(12)     C(11)     C(10)     C(7)      -50.7(8)    yes   . . . .
C(12)     C(11)     C(10)     C(9)      -174.5(7)   yes   . . . .
C(12)     C(11)     C(10)     H(19)     67.5(9)     no    . . . .
C(11)     C(14)     C(15)     C(20)     92(1)       yes   . . . .
C(11)     C(14)     C(15)     C(16)     -85(1)      yes   . . . .
H(20)     C(14)     C(15)     C(20)     -28(1)      no    . . . .
H(20)     C(14)     C(15)     C(16)     153.0(9)    no    . . . .
H(21)     C(14)     C(15)     C(20)     -146(1)     no    . . . .
H(21)     C(14)     C(15)     C(16)     34(1)       no    . . . .
C(7)      C(10)     C(9)      C(8)      54.4(8)     yes   . . . .
C(7)      C(10)     C(9)      H(17)     175.7(7)    no    . . . .
C(7)      C(10)     C(9)      H(18)     -64(1)      no    . . . .
C(11)     C(10)     C(9)      C(8)      178.7(7)    yes   . . . .
C(11)     C(10)     C(9)      H(17)     -59.9(9)    no    . . . .
C(11)     C(10)     C(9)      H(18)     59(1)       no    . . . .
H(19)     C(10)     C(9)      C(8)      -62(1)      no    . . . .
H(19)     C(10)     C(9)      H(17)     58(1)       no    . . . .
H(19)     C(10)     C(9)      H(18)     178(1)      no    . . . .
C(10)     C(9)      C(8)      C(5)      -57(1)      yes   . . . .
C(10)     C(9)      C(8)      H(15)     179(719)    no    . . . .
C(10)     C(9)      C(8)      H(16)     60(1)       no    . . . .
H(17)     C(9)      C(8)      C(5)      -178.8(9)   no    . . . .
H(17)     C(9)      C(8)      H(15)     58(1)       no    . . . .
H(17)     C(9)      C(8)      H(16)     -60(1)      no    . . . .
H(18)     C(9)      C(8)      C(5)      61(1)       no    . . . .
H(18)     C(9)      C(8)      H(15)     -60(1)      no    . . . .
H(18)     C(9)      C(8)      H(16)     179(881)    no    . . . .
C(35)     C(34)     C(31)     C(33)     57(1)       yes   . . . .
C(35)     C(34)     C(31)     C(30)     -176.2(8)   yes   . . . .
C(35)     C(34)     C(31)     C(32)     -58(1)      yes   . . . .
H(46)     C(34)     C(31)     C(33)     175.6(9)    no    . . . .
H(46)     C(34)     C(31)     C(30)     -57(1)      no    . . . .
H(46)     C(34)     C(31)     C(32)     59(1)       no    . . . .
H(47)     C(34)     C(31)     C(33)     -65(1)      no    . . . .
H(47)     C(34)     C(31)     C(30)     60(1)       no    . . . .
H(47)     C(34)     C(31)     C(32)     178(1)      no    . . . .
C(31)     C(34)     C(35)     C(40)     87(1)       yes   . . . .
C(31)     C(34)     C(35)     C(36)     -93(1)      yes   . . . .
H(46)     C(34)     C(35)     C(40)     -32(1)      no    . . . .
H(46)     C(34)     C(35)     C(36)     146(1)      no    . . . .
H(47)     C(34)     C(35)     C(40)     -150.3(9)   no    . . . .
H(47)     C(34)     C(35)     C(36)     28(1)       no    . . . .
H(4)      C(3)      C(1)      C(5)      57(1)       no    . . . .
H(4)      C(3)      C(1)      C(4)      -179(508)   no    . . . .
H(4)      C(3)      C(1)      C(2)      -63(1)      no    . . . .
H(5)      C(3)      C(1)      C(5)      176(1)      no    . . . .
H(5)      C(3)      C(1)      C(4)      -59(1)      no    . . . .
H(5)      C(3)      C(1)      C(2)      56(1)       no    . . . .
H(6)      C(3)      C(1)      C(5)      -62(1)      no    . . . .
H(6)      C(3)      C(1)      C(4)      60(1)       no    . . . .
H(6)      C(3)      C(1)      C(2)      177.0(8)    no    . . . .
C(14)     C(15)     C(20)     C(19)     -179.3(8)   yes   . . . .
C(14)     C(15)     C(20)     H(26)     0(1)        no    . . . .
C(16)     C(15)     C(20)     C(19)     0(1)        yes   . . . .
C(16)     C(15)     C(20)     H(26)     178(1)      no    . . . .
C(14)     C(15)     C(16)     C(17)     178.3(9)    yes   . . . .
C(14)     C(15)     C(16)     H(22)     0(1)        no    . . . .
C(20)     C(15)     C(16)     C(17)     0(1)        yes   . . . .
C(20)     C(15)     C(16)     H(22)     -179(1)     no    . . . .
C(5)      C(1)      C(4)      H(7)      61(1)       no    . . . .
C(5)      C(1)      C(4)      H(8)      -179(1)     no    . . . .
C(5)      C(1)      C(4)      H(9)      -58(1)      no    . . . .
C(3)      C(1)      C(4)      H(7)      -60(1)      no    . . . .
C(3)      C(1)      C(4)      H(8)      59(1)       no    . . . .
C(3)      C(1)      C(4)      H(9)      179(1)      no    . . . .
C(2)      C(1)      C(4)      H(7)      -177(1)     no    . . . .
C(2)      C(1)      C(4)      H(8)      -58(1)      no    . . . .
C(2)      C(1)      C(4)      H(9)      62(1)       no    . . . .
C(5)      C(1)      C(2)      H(1)      60(1)       no    . . . .
C(5)      C(1)      C(2)      H(2)      -178(1)     no    . . . .
C(5)      C(1)      C(2)      H(3)      -58(1)      no    . . . .
C(3)      C(1)      C(2)      H(1)      -179.5(7)   no    . . . .
C(3)      C(1)      C(2)      H(2)      -58(1)      no    . . . .
C(3)      C(1)      C(2)      H(3)      61(1)       no    . . . .
C(4)      C(1)      C(2)      H(1)      -61.9(9)    no    . . . .
C(4)      C(1)      C(2)      H(2)      58(1)       no    . . . .
C(4)      C(1)      C(2)      H(3)      178(1)      no    . . . .
C(39)     C(40)     C(35)     C(34)     -179(719)   yes   . . . .
C(39)     C(40)     C(35)     C(36)     1(1)        yes   . . . .
H(52)     C(40)     C(35)     C(34)     0(1)        no    . . . .
H(52)     C(40)     C(35)     C(36)     -178(1)     no    . . . .
C(35)     C(40)     C(39)     C(38)     0(1)        yes   . . . .
C(35)     C(40)     C(39)     H(51)     -179(881)   no    . . . .
H(52)     C(40)     C(39)     C(38)     179(359)    no    . . . .
H(52)     C(40)     C(39)     H(51)     0(1)        no    . . . .
C(33)     C(31)     C(30)     C(29)     61(1)       yes   . . . .
C(33)     C(31)     C(30)     C(27)     -63(1)      yes   . . . .
C(33)     C(31)     C(30)     H(45)     178(1)      no    . . . .
C(34)     C(31)     C(30)     C(29)     -63(1)      yes   . . . .
C(34)     C(31)     C(30)     C(27)     170.5(8)    yes   . . . .
C(34)     C(31)     C(30)     H(45)     52(1)       no    . . . .
C(32)     C(31)     C(30)     C(29)     177.0(9)    yes   . . . .
C(32)     C(31)     C(30)     C(27)     51(1)       yes   . . . .
C(32)     C(31)     C(30)     H(45)     -66(1)      no    . . . .
C(39)     C(38)     C(37)     C(36)     0(1)        yes   . . . .
C(39)     C(38)     C(37)     H(49)     -179(1)     no    . . . .
H(50)     C(38)     C(37)     C(36)     -178(1)     no    . . . .
H(50)     C(38)     C(37)     H(49)     1(1)        no    . . . .
C(37)     C(38)     C(39)     C(40)     0(1)        yes   . . . .
C(37)     C(38)     C(39)     H(51)     178(1)      no    . . . .
H(50)     C(38)     C(39)     C(40)     178(1)      no    . . . .
H(50)     C(38)     C(39)     H(51)     -1(1)       no    . . . .
C(15)     C(20)     C(19)     C(18)     0(1)        yes   . . . .
C(15)     C(20)     C(19)     H(25)     179(1)      no    . . . .
H(26)     C(20)     C(19)     C(18)     -179(1)     no    . . . .
H(26)     C(20)     C(19)     H(25)     0(2)        no    . . . .
C(34)     C(35)     C(36)     C(37)     179(623)    yes   . . . .
C(34)     C(35)     C(36)     H(48)     0(1)        no    . . . .
C(40)     C(35)     C(36)     C(37)     -1(1)       yes   . . . .
C(40)     C(35)     C(36)     H(48)     178(1)      no    . . . .
C(20)     C(19)     C(18)     C(17)     0(1)        yes   . . . .
C(20)     C(19)     C(18)     H(24)     -179(359)   no    . . . .
H(25)     C(19)     C(18)     C(17)     -177(1)     no    . . . .
H(25)     C(19)     C(18)     H(24)     1(2)        no    . . . .
C(15)     C(16)     C(17)     C(18)     1(1)        yes   . . . .
C(15)     C(16)     C(17)     H(23)     179(881)    no    . . . .
H(22)     C(16)     C(17)     C(18)     -179(359)   no    . . . .
H(22)     C(16)     C(17)     H(23)     -1(2)       no    . . . .
C(38)     C(37)     C(36)     C(35)     0(1)        yes   . . . .
C(38)     C(37)     C(36)     H(48)     -179(359)   no    . . . .
H(49)     C(37)     C(36)     C(35)     -179(359)   no    . . . .
H(49)     C(37)     C(36)     H(48)     0(1)        no    . . . .
C(28)     C(29)     C(30)     C(31)     175.9(9)    yes   . . . .
C(28)     C(29)     C(30)     C(27)     -57(1)      yes   . . . .
C(28)     C(29)     C(30)     H(45)     58(1)       no    . . . .
H(43)     C(29)     C(30)     C(31)     -64(1)      no    . . . .
H(43)     C(29)     C(30)     C(27)     62(1)       no    . . . .
H(43)     C(29)     C(30)     H(45)     178(1)      no    . . . .
H(44)     C(29)     C(30)     C(31)     55(1)       no    . . . .
H(44)     C(29)     C(30)     C(27)     -177(1)     no    . . . .
H(44)     C(29)     C(30)     H(45)     -61(1)      no    . . . .
C(30)     C(29)     C(28)     C(25)     59(1)       yes   . . . .
C(30)     C(29)     C(28)     H(41)     175(1)      no    . . . .
C(30)     C(29)     C(28)     H(42)     -65(1)      no    . . . .
H(43)     C(29)     C(28)     C(25)     -59(1)      no    . . . .
H(43)     C(29)     C(28)     H(41)     55(1)       no    . . . .
H(43)     C(29)     C(28)     H(42)     175(1)      no    . . . .
H(44)     C(29)     C(28)     C(25)     179(622)    no    . . . .
H(44)     C(29)     C(28)     H(41)     -64(1)      no    . . . .
H(44)     C(29)     C(28)     H(42)     54(1)       no    . . . .
C(19)     C(18)     C(17)     C(16)     -1(1)       yes   . . . .
C(19)     C(18)     C(17)     H(23)     179(622)    no    . . . .
H(24)     C(18)     C(17)     C(16)     178(1)      no    . . . .
H(24)     C(18)     C(17)     H(23)     0(2)        no    . . . .
C(24)     C(21)     C(25)     C(26)     58(1)       yes   . . . .
C(24)     C(21)     C(25)     C(28)     -175.7(9)   yes   . . . .
C(24)     C(21)     C(25)     H(36)     -57(1)      no    . . . .
C(22)     C(21)     C(25)     C(26)     -61(1)      yes   . . . .
C(22)     C(21)     C(25)     C(28)     64(1)       yes   . . . .
C(22)     C(21)     C(25)     H(36)     -177(1)     no    . . . .
C(23)     C(21)     C(25)     C(26)     176.2(9)    yes   . . . .
C(23)     C(21)     C(25)     C(28)     -58(1)      yes   . . . .
C(23)     C(21)     C(25)     H(36)     59(1)       no    . . . .
C(25)     C(21)     C(24)     H(33)     -64(1)      no    . . . .
C(25)     C(21)     C(24)     H(34)     53(1)       no    . . . .
C(25)     C(21)     C(24)     H(35)     175(1)      no    . . . .
C(22)     C(21)     C(24)     H(33)     58(1)       no    . . . .
C(22)     C(21)     C(24)     H(34)     176(1)      no    . . . .
C(22)     C(21)     C(24)     H(35)     -62(1)      no    . . . .
C(23)     C(21)     C(24)     H(33)     175(1)      no    . . . .
C(23)     C(21)     C(24)     H(34)     -66(1)      no    . . . .
C(23)     C(21)     C(24)     H(35)     55(1)       no    . . . .
C(25)     C(21)     C(22)     H(27)     -177(1)     no    . . . .
C(25)     C(21)     C(22)     H(28)     -57(1)      no    . . . .
C(25)     C(21)     C(22)     H(29)     61(1)       no    . . . .
C(24)     C(21)     C(22)     H(27)     61(1)       no    . . . .
C(24)     C(21)     C(22)     H(28)     -178(1)     no    . . . .
C(24)     C(21)     C(22)     H(29)     -59(1)      no    . . . .
C(23)     C(21)     C(22)     H(27)     -54(1)      no    . . . .
C(23)     C(21)     C(22)     H(28)     65(1)       no    . . . .
C(23)     C(21)     C(22)     H(29)     -175.0(8)   no    . . . .
C(25)     C(21)     C(23)     H(30)     -173(1)     no    . . . .
C(25)     C(21)     C(23)     H(31)     -56(1)      no    . . . .
C(25)     C(21)     C(23)     H(32)     62(1)       no    . . . .
C(24)     C(21)     C(23)     H(30)     -54(1)      no    . . . .
C(24)     C(21)     C(23)     H(31)     62(1)       no    . . . .
C(24)     C(21)     C(23)     H(32)     -178(1)     no    . . . .
C(22)     C(21)     C(23)     H(30)     62(1)       no    . . . .
C(22)     C(21)     C(23)     H(31)     179(1)      no    . . . .
C(22)     C(21)     C(23)     H(32)     -61(1)      no    . . . .
C(21)     C(25)     C(26)     C(27)     -172.8(9)   yes   . . . .
C(21)     C(25)     C(26)     H(37)     -54(1)      no    . . . .
C(21)     C(25)     C(26)     H(38)     65(1)       no    . . . .
C(28)     C(25)     C(26)     C(27)     58(1)       yes   . . . .
C(28)     C(25)     C(26)     H(37)     176(1)      no    . . . .
C(28)     C(25)     C(26)     H(38)     -63(1)      no    . . . .
H(36)     C(25)     C(26)     C(27)     -57(1)      no    . . . .
H(36)     C(25)     C(26)     H(37)     60(1)       no    . . . .
H(36)     C(25)     C(26)     H(38)     -179(1)     no    . . . .
C(21)     C(25)     C(28)     C(29)     172.0(9)    yes   . . . .
C(21)     C(25)     C(28)     H(41)     54(1)       no    . . . .
C(21)     C(25)     C(28)     H(42)     -64(1)      no    . . . .
C(26)     C(25)     C(28)     C(29)     -59(1)      yes   . . . .
C(26)     C(25)     C(28)     H(41)     -177(1)     no    . . . .
C(26)     C(25)     C(28)     H(42)     63(1)       no    . . . .
H(36)     C(25)     C(28)     C(29)     55(1)       no    . . . .
H(36)     C(25)     C(28)     H(41)     -62(1)      no    . . . .
H(36)     C(25)     C(28)     H(42)     178(1)      no    . . . .
C(25)     C(26)     C(27)     C(30)     -58(1)      yes   . . . .
C(25)     C(26)     C(27)     H(39)     62(1)       no    . . . .
C(25)     C(26)     C(27)     H(40)     -178(1)     no    . . . .
H(37)     C(26)     C(27)     C(30)     -176(1)     no    . . . .
H(37)     C(26)     C(27)     H(39)     -55(1)      no    . . . .
H(37)     C(26)     C(27)     H(40)     64(1)       no    . . . .
H(38)     C(26)     C(27)     C(30)     63(1)       no    . . . .
H(38)     C(26)     C(27)     H(39)     -175(1)     no    . . . .
H(38)     C(26)     C(27)     H(40)     -55(1)      no    . . . .
C(26)     C(27)     C(30)     C(31)     -174.8(9)   yes   . . . .
C(26)     C(27)     C(30)     C(29)     58(1)       yes   . . . .
C(26)     C(27)     C(30)     H(45)     -57(1)      no    . . . .
H(39)     C(27)     C(30)     C(31)     63(1)       no    . . . .
H(39)     C(27)     C(30)     C(29)     -63(1)      no    . . . .
H(39)     C(27)     C(30)     H(45)     -179(719)   no    . . . .
H(40)     C(27)     C(30)     C(31)     -56(1)      no    . . . .
H(40)     C(27)     C(30)     C(29)     176(1)      no    . . . .
H(40)     C(27)     C(30)     H(45)     60(1)       no    . . . .

#==============================================================================

# Additional structures and associated data_? identifiers
# should be added at this point if there is more than one
# structure analysis in the CIF.

#==============================================================================

#     End of CIF

#==============================================================================
